# Supplementary material
Source: MDPI journal article supplement (https://www.mdpi.com/2077-0472/12/9/1438)

Example of graphical presentation of regression results (rapeseed 2018)

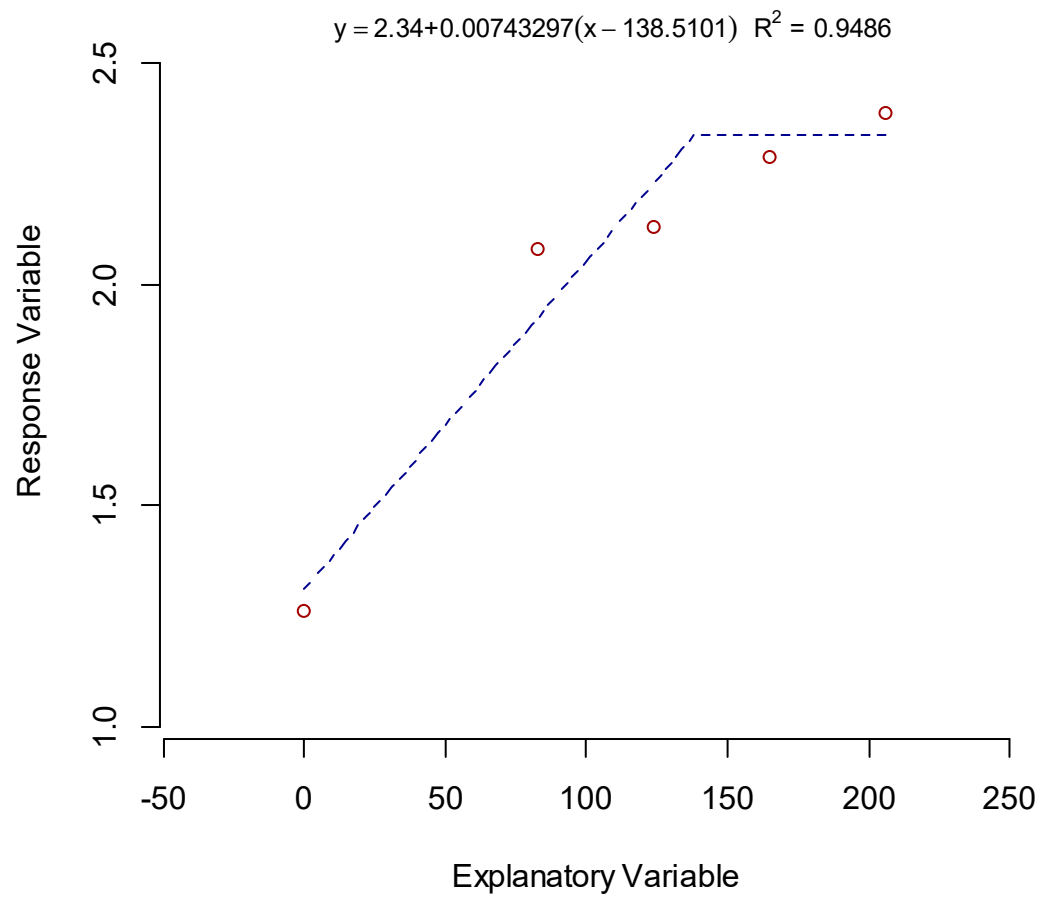

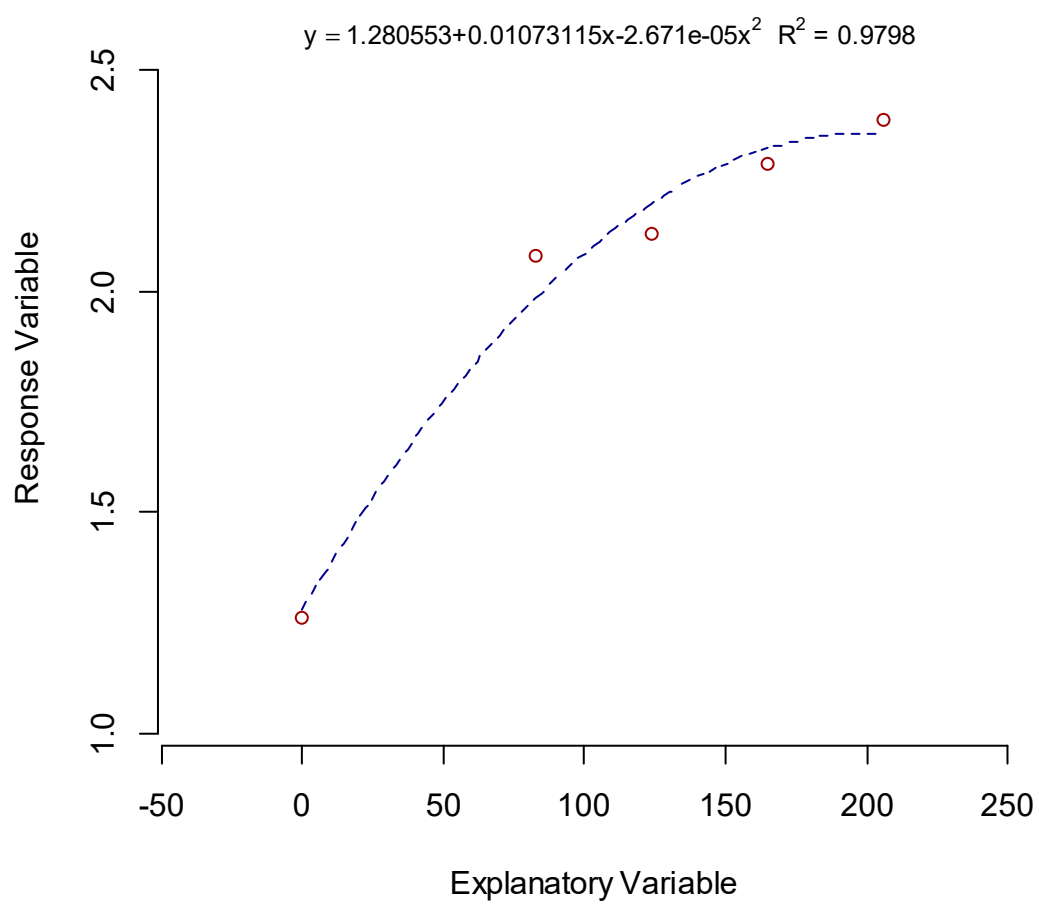

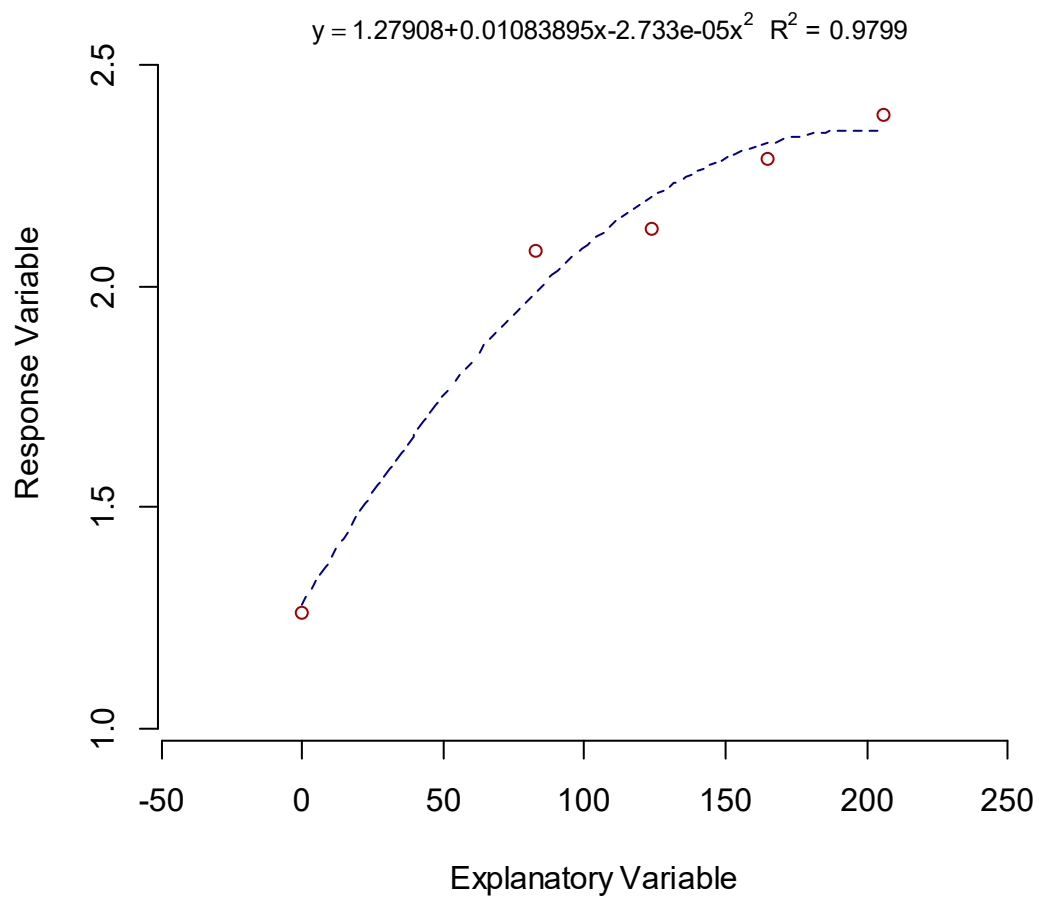

Supplement: s1 [file s1]
